# Supplementary material for: Diversity and Career Progression in Dental School Staff in the UK and Ireland
Source: Preprints.org preprint supplement (doi:10.20944/preprints202111.0147.v1), 2021-11-08
Supplement: Supplementary file 1 [file supplementary]

QuestionCode  
id  
createdAt  
lastModifiedAt  
receivedAt  
distribution  
email  
School  
JobTitle  
JobTitle\_Other  
JobRole\_YrSt  
Role\_Cat  
Role\_Cat\_Other  
PermanentContract  
PermContractYr  
ContractType  
WTE\_Uni  
WTE\_Yr  
FirstJobTitle  
AttemptsToPost  
TimeOutChoice  
TimeOutTime  
TimeAway  
TimeAwayTime  
Lecture\_YrSt  
SLecture\_YrSt  
Prof\_YrSt  
ExtendedTimeOut  
ETimeOutTimeN  
ETimeOutTimeAgg  
SpecTraining  
InTraining  
AttemptsSpecTraining  
ApplySpecTraining  
SpecialistTraining  
Consultant  
ConsultantYr  
Employer  
EmployerOther  
Speciality  
Ethnicity  
EthnicityOther  
Gender  
GenderOther  
AgeGroup  
Language  
Qual\_PhD  
Qual\_MPhil  
Qual\_DDS  
Qual\_BDS  
Qual\_D.Clin.Psy  
Qual\_MBBS  
Qual\_BSc  
Qual\_BA  
Qual\_MSc  
Qual\_MRes  
Qual\_BMedSci  
Qual\_MA  
Qual\_PG Dip  
Qual\_PG Cert  
Qual\_FDS RCS  
Qual\_FDS (specialty) RCS  
Qual\_Masters in specialty qualification e.g. MPAed Dent MOrth  
Qual\_Other Doctoral level qualification (please specify)  
Qual\_Other graduate level qualification (please specify)  
PhD\_UK  
PhD\_Ctry  
PhD\_Uni  
PhD\_Yr  
PhD\_YrEnd  
MPhil\_UK  
MPhil\_Ctry  
MPhil\_Uni  
MPhil\_Yr  
MPhil\_YrEnd  
DDS\_UK  
DDS\_Ctry  
DDS\_Uni  
DDS\_Yr  
DDS\_YrEnd  
BDS\_UK  
BDS\_Ctry  
BDS\_Uni  
BDS\_Yr  
BDS\_YrEnd  
DCLIN\_UK  
DCLIN\_Ctry  
DCLIN\_Uni  
DCLIN\_Yr  
DCLIN\_YrEnd  
MBBS\_UK  
MBBS\_Ctry  
MBBS\_Uni  
MBBS\_Yr  
MBBS\_YrEnd  
BSc\_UK  
BSc\_Ctry  
BSc\_Uni  
BSc\_Yr  
BSc\_YrEnd  
BA\_UK  
BA\_Ctry  
BA\_Uni  
BA\_Yr  
BA\_YrEnd  
MSc\_UK  
MSc\_Ctry  
MSc\_Uni  
MSc\_Yr  
MSc\_YrEnd  
MRes\_UK  
MRes\_Ctry  
MRes\_Uni  
MRes\_Yr  
MRes\_YrEnd  
BMedSci\_UK  
BMedSci\_Ctry  
BMedSci\_Uni  
BMedSci\_Yr  
BMedSci\_YrEnd  
MA\_UK  
MA\_Ctry  
MA\_Uni  
MA\_Yr  
MA\_YrEnd  
PGDip\_UK  
PGDip\_Ctry  
PGDip\_Uni  
PGDip\_Yr  
PGDip\_YrEnd  
PGCert\_UK  
PGCERT\_Ctry  
PGCert\_Uni  
PGCert\_Yr  
PGCert\_YrEnd  
FDSRCS\_UK  
FDSRCS\_Ctry  
FDSRCS\_Uni  
FDSRCS\_Yr  
FDSRCS\_YrEnd  
FDSPEC\_UK  
FDSPEC\_Ctry  
FDSPEC\_Uni  
FDSPEC\_Yr  
FDSPECRCDS\_YrEnd  
Masters\_UK  
Masters\_Ctry  
Masters\_Uni  
Masters\_Yr  
Masters\_YrEnd  
OtherDoc\_UK  
OtherDoc\_Ctry  
OtherDoc\_Uni  
OtherDoc\_Yr  
OtherDoc\_YrEnd  
OtherGrad\_UK  
OtherGrad\_Ctry  
OtherGrad\_Uni  
OtherGrad\_Yr  
OtherGrad\_YrEnd  
OtherQual  
StudyDegree  
StudyDegree\_FT  
Int1  
Int2  
SE1  
SE2  
SE3  
SE4  
SE5  
SE6  
SE7  
SE8  
SE9  
SE10  
Barrier1  
Barrier1\_FT  
Barrier2  
Barrier2\_FT

## QuestionText

Response ID  
Survey Start Time  
Survey Last Modified Time  
Survey Submission Time  
Distribution Method  
Respondent Email  
Which UK dental school do you work at? \*  
What is your current job title? \*  
Please state your job title \*  
What year did you start in this role? \*  
Which of the following categories is the best match to you? \*  
Please specify your role \*  
Do you currently have a permanent contract of employment with the university? \*  
What year did you first have a permanent contract of employment? \*  
What type of contract do you have?  
What is your current whole time equivalent with the university? \*  
What year did you start working in an academic or clinical academic post (substantive or honorary university contract of at least 0.1 wte) at a university?  
What was the job title of your first academic or clinical academic post at a university? \*  
Approximately how many attempts did it take you to secure your first academic or clinical academic post? \*  
Once eligible to apply for an academic post did you work by choice in a different sector before applying to work in academia? \*  
For how long did you work in a different sector? \*  
Since starting to work in an academic post, have you had periods of time away from academia working in different settings (eg full time clinical practice or industry)? \*  
If yes, how long were you away from academia? \*  
What year (if applicable) did you start working as a lecturer / clinical lecturer or equivalent?  
What year (if applicable) did you start working as a senior lecturer / clinical senior lecturer or equivalent?  
What year (if applicable) did you start working as a professor or equivalent?  
Since starting an academic post have you had any extended time out of work for personal or family reasons? \*  
If yes, on how many occasions did you take leave?  
What was the total length of leave that you took (on all occasions added together)  
For dentists only: Have you ever applied for specialty training  
Are you currently in or have you completed specialty training? \*  
How many attempts did it take you to successfully gain a place for specialty training? \*  
How many times did you apply to specialty training? \*  
What level of specialist training have you completed? \*  
Are you a Consultant? \*  
What year did you become a Consultant? \*  
Is your primary employer \*  
Who is your primary employer?  
What speciality are you qualified in? \*  
What is your ethnic group? \*  
Please tell us your own description of your ethnicity  
To which gender do you most identify? \*  
Please tell us your own description of your gender identity  
What is your age group? \*  
Is English a native language to you? \*  
What qualifications do you hold?/PhD  
What qualifications do you hold?/MPhil  
What qualifications do you hold?/DDS  
What qualifications do you hold?/BDS  
What qualifications do you hold?/D.Clin.Psy  
What qualifications do you hold?/MBBS  
What qualifications do you hold?/BSc  
What qualifications do you hold?/BA  
What qualifications do you hold?/MSc  
What qualifications do you hold?/MRes  
What qualifications do you hold?/BMedSci  
What qualifications do you hold?/MA  
What qualifications do you hold?/PGDip  
What qualifications do you hold?/PGCert  
What qualifications do you hold?/FDS RCS  
What qualifications do you hold?/FDS (specialty) RCS  
What qualifications do you hold?/Masters in specialty qualification e.g. MPAed Dent MOrth  
What qualifications do you hold?/Other Doctoral level qualification (please specify)  
What qualifications do you hold?/Other graduate level qualification (please specify)  
PhD - Did you receive this qualification from a UK University? \*  
PhD - Which country did your receive this qualification? \*  
PhD - Please state the university where you received this qualification? \*  
PhD - What year did you start studying towards this qualification? \*  
PhD - What year did you receive this qualification? \*  
Mphil - Did you receive this qualification from a UK University? \*  
MPhil - Which country did your receive this qualification? \*  
MPhil - Please state the university where you received this qualification? \*  
MPhil - What year did you start studying towards this qualification? \*  
MPhil - What year did you receive this qualification? \*  
DDS - Did you receive this qualification from a UK University? \*  
DDS - Which country did your receive this qualification? \*  
DDS - Please state the university where you received this qualification? \*  
DDS - What year did you start studying towards this qualification? \*  
DDS - What year did you receive this qualification? \*  
BDS - Did you receive this qualification from a UK University? \*  
BDS - Which country did your receive this qualification? \*  
BDS - Please state the university where you received this qualification? \*  
BDS - What year did you start studying towards this qualification? \*  
BDS - What year did you receive this qualification? \*  
D.Clin.Psy - Did you receive this qualification from a UK University? \*  
D.Clin.Psy - Which country did your receive this qualification? \*  
D.Clin.Psy - Please state the university where you received this qualification? \*  
D.Clin.Psy - What year did you start studying towards this qualification? \*  
D.Clin.Psy - What year did you receive this qualification? \*  
MBBS - Did you receive this qualification from a UK University? \*  
MBBS - Which country did your receive this qualification? \*  
MBBS - Please state the university where you received this qualification? \*  
MBBS - What year did you start studying towards this qualification? \*  
MBBS - What year did you receive this qualification? \*  
BSc - Did you receive this qualification from a UK University? \*  
BSc - Which country did your receive this qualification? \*  
BSc - Please state the university where you received this qualification? \*  
BSc - What year did you start studying towards this qualification? \*  
BSc - What year did you receive this qualification? \*  
BA - Did you receive this qualification from a UK University? \*  
BA - Which country did your receive this qualification? \*  
BA - Please state the university where you received this qualification? \*  
BA - What year did you start studying towards this qualification? \*  
BA - What year did you receive this qualification? \*  
MSc - Did you receive this qualification from a UK University? \*  
MSc - Which country did your receive this qualification? \*  
MSc - Please state the university where you received this qualification? \*  
MSc - What year did you start studying towards this qualification? \*  
MSc - What year did you receive this qualification? \*  
MRes - Did you receive this qualification from a UK University? \*  
MRes - Which country did your receive this qualification? \*  
MRes - Please state the university where you received this qualification? \*  
MRes - What year did you start studying towards this qualification? \*  
MRes - What year did you receive this qualification? \*  
BMedSci - Did you receive this qualification from a UK University? \*  
BMedSci - Which country did your receive this qualification? \*  
BMedSci - Please state the university where you received this qualification? \*  
BMedSci - What year did you start studying towards this qualification? \*  
BMedSci - What year did you receive this qualification? \*  
MA - Did you receive this qualification from a UK University? \*  
MA - Which country did your receive this qualification? \*  
MA - Please state the university where you received this qualification? \*  
MA - What year did you start studying towards this qualification? \*  
MA - What year did you receive this qualification? \*  
PGDip - Did you receive this qualification from a UK University? \*  
PGDip - Which country did your receive this qualification? \*  
PGDip - Please state the university where you received this qualification? \*  
PGDip - What year did you start studying towards this qualification? \*  
PGDip - What year did you receive this qualification? \*  
PGCert - Did you receive this qualification from a UK University? \*  
PGCert - Which country did your receive this qualification? \*  
PGCert - Please state the university where you received this qualification? \*  
PGCert - What year did you start studying towards this qualification? \*  
PGCert - What year did you receive this qualification? \*  
FDS RCS - Did you receive this qualification from a UK University? \*  
FDS RCS - Which country did your receive this qualification? \*  
FDS RCS - Please state the university where you received this qualification? \*  
FDS RCS - What year did you start studying towards this qualification? \*  
FDS RCS - What year did you receive this qualification? \*  
FDS (specialty) RCS - Did you receive this qualification from a UK University? \*  
FDS (specialty) RCS - Which country did your receive this qualification? \*  
FDS (specialty) RCS - Please state the university where you received this qualification? \*  
FDS (specialty) RCS - What year did you start studying towards this qualification? \*  
FDS (specialty) RCS - What year did you receive this qualification? \*  
Masters in specialty qualification e.g. MPAed Dent MOrth - Did you receive this qualification from a UK University? \*  
Masters in specialty qualification e.g. MPAed Dent MOrth - Which country did your receive this qualification? \*  
Masters in specialty qualification e.g. MPAed Dent MOrth - Please state the university where you received this qualification? \*  
Masters in specialty qualification e.g. MPAed Dent MOrth - What year did you start studying towards this qualification? \*  
Masters in specialty qualification e.g. MPAed Dent MOrth - What year did you receive this qualification? \*  
Other Doctoral level qualification - Did you receive this qualification from a UK University? \*  
Other Doctoral level qualification - Which country did your receive this qualification? \*  
Other Doctoral level qualification - Please state the university where you received this qualification? \*  
Other Doctoral level qualification - What year did you start studying towards this qualification? \*  
Other Doctoral level qualification - What year did you receive this qualification? \*  
Other graduate level qualification - Did you receive this qualification from a UK University? \*  
Other graduate level qualification - Which country did your receive this qualification? \*  
Other graduate level qualification - Please state the university where you received this qualification? \*  
Other graduate level qualification - What year did you start studying towards this qualification? \*  
Other graduate level qualification - What year did you receive this qualification? \*  
Please tell us what qualifications you hold  
Are you currently studying towards a degree-level qualification?  
Please specify the degree-level qualification you are studying towards  
How many of these characteristics do you identify with (transgender, homosexual or bisexual, low socioeconomic status background, disability). \*  
Taking into account your race, gender, transgender status, sexuality, socioeconomic background and disability status how many of these factors do you believe may be or have been a source of discrimination or disadvantage that has affected you at work? \*  
Been invited to give a conference presentation \*  
Given a conference presentation \*  
Been invited to give a keynote address at a conference \*  
Been awarded a grant internal to the university you work at \*  
Been awarded an externally funded grant \*  
Received an award or prize from your university \*  
Received an award or prize from a different organisation \*  
Published a peer reviewed journal article \*  
Been asked to review an external grant application \*  
Been a member of a grant awarding panel \*  
Do you believe that there are barriers to career progression in dental schools based on race, gender and other intersecting characteristics? \*  
Please explain your answer :  
Have you personally experienced or directly observed discrimination as a result of race, gender or other characteristics in your work role? \*  
Please explain your answer :
